# Supplementary material for: Intraocular pressure reduction in a pigmentary glaucoma model by Goniotome Ab interno trabeculectomy
Source: PubMed Central journal article supplement (PMC7162452; doi:10.1371/journal.pone.0231360), 2020-04-16
Supplement: pone.0231360.s001.pdf [file pone.0231360.s001.pdf]

|                   | C        |      |      |      |
|-------------------|----------|------|------|------|
|                   | baseline | 48h  | 72h  | 96h  |
|                   | 14,2     | 21,3 | 28,0 | 25,0 |
|                   | 10,8     | 24,6 | 26,3 | 24,1 |
|                   | 10,6     | 24,6 | 21,0 | 20,0 |
|                   | 12,6     | 12,8 | 14,7 | 17,7 |
|                   | 11,6     | 20,5 | 23,8 | 27,0 |
|                   | 12,3     | 14,1 | 16,2 | 16,1 |
|                   | 11,3     | 11,1 | 13,0 | 13,5 |
|                   | 8,1      | 12,5 | 17,2 | 18,6 |
| mean              | 11,4     | 17,7 | 20,0 | 20,2 |
| SE                | 0,6      | 2,0  | 2,0  | 1,7  |
|                   |          |      |      |      |
|                   | G        |      |      |      |
|                   | baseline | 48h  | 72h  | 96h  |
|                   | 13,6     | 24,8 | 7,6  | 7,1  |
|                   | 5,2      | 22,4 | 15,9 | 7,6  |
|                   | 1,9      | 8,6  | 5,6  | 5,1  |
|                   | 5,6      | 29,4 | 22,0 | 4,6  |
|                   | 18,7     | 20,5 | 8,3  | 5,6  |
|                   | 4,0      | 18,8 | 7,6  | 10,6 |
|                   | 19,3     | 26,9 | 4,6  | 4,8  |
|                   |          |      |      |      |
| mean              | 9,8      | 21,6 | 10,2 | 6,5  |
| SE                | 2,7      | 2,6  | 2,4  | 0,8  |
|                   |          |      |      |      |
| combined baseline |          |      |      |      |
| mean              | 10,7     |      |      |      |
| SE                | 1,3      |      |      |      |
